# Supplementary material for: Preventing thermolysis: precursor design for volatile copper compounds
Source: Royal Society of Chemistry journal article supplement (doi:10.1039/c2cc35415b), 2012-01-01
Supplement: c2cc35415b.pdf [file c2cc35415b.pdf]

## **Supplemental documents**

## Experimental

**General Considerations:** All manipulations involving the synthesis and handling of copper(I) compounds were performed in a nitrogen filled drybox. All manipulations involving the synthesis of the pyrrole and the pyrrolidine were performed in air. The chemicals: CuCl, 2.5M BuLi in hexanes, tert-butyl amine, and diethyl sulfate were purchased from Aldrich Chemical Company and used as received. All solvents used in manipulation of copper(I) compounds were ACS grade and purified from an MBraun Solvent Purifier System. All other solvents were ACS grade and used as received. Nuclear Magnetic Resonance was done on 300 MHz Avance 3 and 400 MHz Bruker AMX. Canadian Microanalytical Service Ltd. performed combustion analysis. Thermogravimetric analysis was performed on a TA Instruments Q50 apparatus located in an MBraun Labmaster 130 Dry box under a nitrogen atmosphere. 5, 5-dimethyl-2-pyrrolidone was prepared by literature procedures.<sup>i</sup> Tert-butyl ammonium chloride was prepared by addition of HCl<sub>(aq)</sub> to tert-butyl amine in ethanol followed by solvent removal.

**5-ethoxy-3, 4-dihydro-2,2-dimethyl-2H-pyrrole:** Similar to the literature preparation for 5-ethoxy-3, 4-dihydro-2H-pyrrole.<sup>ii</sup> 5, 5-dimethyl-2-pyrrolidone (9.82 g, 86.8 mmol) and diethyl sulfate (13.38 g, 86.8 mmol) were added to a pressure vessel and heated for 24 h at 60 °C. Et<sub>2</sub>O (30 ml) was added and the biphasic mixture was cool in an ice bath. A 25 ml aqueous solution of Na<sub>2</sub>CO<sub>3</sub> (9.20 g, 86.8 mmol) was added drop wise. The top organic layer was separated and extraction continued with 3 x 40 ml of Et<sub>2</sub>O. The combined extractions were dried over MgSO<sub>4</sub>. The majority of Et<sub>2</sub>O was removed on a roto-vap followed by condensation of the remaining volatiles into a cold trap under reduced pressure thereby transferring remaining Et<sub>2</sub>O and product to the cold trap. A solution of the intended product (11.45 g, 93.4%) in 10.65 g of Et<sub>2</sub>O was obtained and used without additional purification. <sup>1</sup>H NMR (400 MHz, CDCl<sub>3</sub>): δ 4.16 (q, 2H, COCH<sub>2</sub>CH<sub>3</sub>), δ 2.53 (t, 2H, NC(CH<sub>3</sub>)<sub>2</sub>CH<sub>2</sub>CH<sub>2</sub>C), δ 1.80 (t, 2H, NC(CH<sub>3</sub>)<sub>2</sub>CH<sub>2</sub>CH<sub>2</sub>C), δ 1.30 (t, 3H, COCH<sub>2</sub>CH<sub>3</sub>), δ 1.23 (s, 6H, NC(CH<sub>3</sub>)<sub>2</sub>CH<sub>2</sub>CH<sub>2</sub>C). <sup>13</sup>C NMR (400 MHz, CDCl<sub>3</sub>): δ 170.05 (NCO), δ 67.36 (NC(CH<sub>3</sub>)<sub>2</sub>), δ 63.67 (OCH<sub>2</sub>CH<sub>3</sub>), δ 36.73 (NC(CH<sub>3</sub>)<sub>2</sub>CH<sub>2</sub>CH<sub>2</sub>C), δ 31.58 (NC(CH<sub>3</sub>)<sub>2</sub>CH<sub>2</sub>CH<sub>2</sub>C), δ 29.84 (NC(CH<sub>3</sub>)<sub>2</sub>CH<sub>2</sub>CH<sub>2</sub>C), δ 14.41 (OCH<sub>2</sub>CH<sub>3</sub>). HRMS (EI) *m/z* calcd for C<sub>8</sub>H<sub>15</sub>NO M<sup>+</sup> 141.1154, found 141.1164.

**Tertbutyl-imino-2,2-dimethylpyrrolidine:** In a pressure vessel, 5-ethoxy-3,4-dihydro-2,2-dimethyl-2H-pyrrole (11.45 g, 81.1 mmol) in 10.65 g of Et<sub>2</sub>O, tert-butyl ammonium chloride (8.89 g, 81.1 mmol), and tert butyl amine (11.86g, 162.2 mmol) were dissolved in 80 mL of ethanol. The pressure vessel was heated to 130 °C for 2 days with stirring. The vessels was removed from heat and cooled to room temperature. Volatiles were stripped under reduced pressure. The solid residue was dissolved in 80 mL of H<sub>2</sub>O and made basic with 40 mL of 6 M NaOH. The aqueous solution was extracted with 3 x 60 mL of Et<sub>2</sub>O. The combined Et<sub>2</sub>O extractions were dried over Na<sub>2</sub>SO<sub>4</sub> and then the solution was concentrated under reduced pressure to obtain 11.43 g of a light yellow liquid, 83.8%. <sup>1</sup>H NMR (400 MHz, CDCl<sub>3</sub>): δ 2.46 (t, 2H, NC(CH<sub>3</sub>)<sub>2</sub>CH<sub>2</sub>CH<sub>2</sub>C), δ 1.65 (t, 2H, NC(CH<sub>3</sub>)<sub>2</sub>CH<sub>2</sub>CH<sub>2</sub>C), δ 1.34 (s, (H, NC(CH<sub>3</sub>)<sub>3</sub>), δ 1.19 (s, 6H, NC(CH<sub>3</sub>)<sub>2</sub>CH<sub>2</sub>CH<sub>2</sub>C) <sup>13</sup>C NMR (400 MHz, CDCl<sub>3</sub>): δ 161.57 (NCO), δ 69.03 (NC(CH<sub>3</sub>)<sub>2</sub>), δ 50.81 (NC(CH<sub>3</sub>)<sub>3</sub>), δ 36.60 (NC(CH<sub>3</sub>)<sub>2</sub>CH<sub>2</sub>CH<sub>2</sub>C), δ 34.62 (NC(CH<sub>3</sub>)<sub>2</sub>CH<sub>2</sub>CH<sub>2</sub>C), δ 29.85 (NC(CH<sub>3</sub>)<sub>2</sub>), δ 29.30 (NC(CH<sub>3</sub>)<sub>3</sub>). HRMS (EI) *m/z* calcd for C<sub>10</sub>H<sub>20</sub>N<sub>2</sub> M<sup>+</sup> 168.1626, found 168.1618.

**Copper(I) tertbutyl-imino-2,2-dimethylpyrrolidinate (1):** Tertbutyl-imino-2,2-dimethylpyrrolidine (5.103 g, 13.07 mmol) was dissolved in 170 mL of toluene and the solution was cooled on an ice bath. 12.13 ml of 2.5 M BuLi was added dropwise. The solution warmed to r.t as it stirred overnight. CuCl (3.26 g, 32.9 mmol) was added and stirring continued for 18 h. The cloudy, light brown solution was filtered and the filter cake was extracted with 4 x 20 of THF. Volatiles were stripped from the combined toluene and THF solutions to afford an off-white solid. The solid was sublimed at 130°C at 40 mtorr

and 5.795 g, 82.7 %, of a white solid was obtained. Mp >270°C. <sup>1</sup>H NMR (300 MHz, C<sub>6</sub>D<sub>6</sub>): δ 2.428 (t, 2H, NC(CH<sub>3</sub>)<sub>2</sub>CH<sub>2</sub>CH<sub>2</sub>C), δ 1.581 (t, 2H, NC(CH<sub>3</sub>)<sub>2</sub>CH<sub>2</sub>CH<sub>2</sub>C), δ 1.328 (s, 9H, NC(CH<sub>3</sub>)<sub>3</sub>), δ 1.196 (s, 6H, NC(CH<sub>3</sub>)<sub>2</sub>CH<sub>2</sub>CH<sub>2</sub>C). <sup>13</sup>C NMR (300 MHz, C<sub>6</sub>D<sub>6</sub>): δ 177.617 (NC(CH<sub>3</sub>)<sub>2</sub>CH<sub>2</sub>CH<sub>2</sub>C), δ 61.176 (NC(CH<sub>3</sub>)<sub>3</sub>), δ 53.332 (NC(CH<sub>3</sub>)<sub>2</sub>CH<sub>2</sub>CH<sub>2</sub>C), δ 38.095 (NC(CH<sub>3</sub>)<sub>2</sub>CH<sub>2</sub>CH<sub>2</sub>C), δ 33.215 (NC(CH<sub>3</sub>)<sub>3</sub>), δ 31.931 (NC(CH<sub>3</sub>)<sub>2</sub>CH<sub>2</sub>CH<sub>2</sub>C), δ 30.940 (NC(CH<sub>3</sub>)<sub>2</sub>CH<sub>2</sub>CH<sub>2</sub>C). Combustion analysis, found (calculated): C, 52.44(52.04); H, 8.36(8.30); N, 12.27(12.14).

**Crystallography:** X-ray structural analysis for **1**: Crystals were selected and mounted on plastic mesh using viscous oil flash-cooled to the data collection temperature. Data were collected on a Bruker-AXS APEX CCD diffractometer with graphite-monochromated Mo-K $\alpha$  radiation ( $\lambda=0.71073$  Å). Unit cell parameters were obtained from 60 data frames, 0.3°  $\omega$ , from three different sections of the Ewald sphere. The systematic absences in the data and the unit cell parameters were uniquely consistent to P21/c. The data-sets were treated with SADABS absorption corrections based on redundant multiscan data.<sup>iii</sup> The structures were solved using direct methods and refined with full-matrix, least-squares procedures on F2. The compound molecules each located on an inversion point. All non-hydrogen atoms were refined with anisotropic displacement parameters. All hydrogen atoms were treated as idealized contributions. Atomic scattering factors are contained in the SHELXTL 6.12 program library.

**Surface Exposure Experiments:** The exposure experiments were performed in a home-built reactor. The reaction chamber consisted of a stainless steel ring support covered in 200 stainless steel mesh with a plug of glass wool to prevent loss of silica powder. The system had one inlet from a heated bubbler and one inlet for He (purity of 99.999%). All fittings used in this system were either CF or VCR to ensure a high-vacuum seal. The system was leak checked using a gas thermal conductivity/leak detector (Gow-Mac Instrument Co.) and an overpressure of He. For the exposure experiments, typically about 1g of high surface area SiO<sub>2</sub> powder (EP10X; PQ Corporation; 300m<sup>2</sup>/g S.A.; 1.8cm<sup>3</sup>/g P.V.; 24nm P.S.; 100 $\mu$ m P.D.) was used. The powder was pre-treated in the reactor at 350°C for 16h under vacuum before exposure to the precursor. The reactor and lines were heated to temperature and allowed to equilibrate for 1-2h before introduction of the precursor. The precursor (typically 0.6-0.8g) was then vaporized and transported to the substrate with the system under 10<sup>-4</sup> Torr vacuum. The substrate was exposed to volatilized precursor for 17h before the system was cooled to room temperature for handling. Both precursor and substrate were handled in inert atmosphere.

**Characterization of Surface Species:** Solid-state NMR experiments were performed at 4.7T on a Bruker Avance III console. All spectra were obtained using a Bruker 7mm <sup>1</sup>H/X/Y probe. <sup>13</sup>C ( $\nu_0 = 50.3$ MHz) cross-polarization magic angle spinning (CP/MAS) experiments were collected at a spinning rate of 4.5kHz using a 3.4 $\mu$ s 90° proton pulse with a contact time of 2ms where the contact pulse was ramped on the <sup>1</sup>H channel. A relaxation delay of 2s was sufficient to prevent saturation and typically total acquisition times were 16-30h. Glycine was used as an external secondary reference for the <sup>13</sup>C chemical shift scale. Spectra were treated with 40Hz line broadening during processing. All spectra were obtained with high power proton decoupling during acquisition. Samples were prepared for High Resolution NMR (HR-NMR) by adding a small amount, typically 40-50mg, of modified silica powder to 2mL of D<sub>2</sub>O, agitating, and allowed to sit for 15min. The D<sub>2</sub>O solution was then decanted and studied via HR-NMR. d<sub>4</sub>-TSP was used as an internal reference.

- i Moffett, R. B. *Organic Synthesis*, **1952**, 32, 59; Osby, J. O.; Ganem, B. *Tetrahedron Lett.* **1985**, 26, 6413.
- ii Beckmann, U, Eichberger, E.; Lindner, M.; Bongartz, M.; Kunz, P. C. *Eur. J. Org. Chem.* **2008**, 24, 4139.
- iii G. M. Sheldrick, *Acta Cryst.* 2008, A64, 112.

data\_seab057

```
_audit_creation_method          SHELXL-97
_chemical_name_systematic
;
?
;
_chemical_name_common           ?
_chemical_melting_point         ?
_chemical_formula_moiety        ?
_chemical_formula_sum           'C20 H38 Cu2 N4'
_chemical_formula_weight        461.62

loop_
  _atom_type_symbol
  _atom_type_description
  _atom_type_scatter_dispersion_real
  _atom_type_scatter_dispersion_imag
  _atom_type_scatter_source
  'C' 'C' 0.0033 0.0016
  'International Tables Vol C Tables 4.2.6.8 and 6.1.1.4'
  'H' 'H' 0.0000 0.0000
  'International Tables Vol C Tables 4.2.6.8 and 6.1.1.4'
  'N' 'N' 0.0061 0.0033
  'International Tables Vol C Tables 4.2.6.8 and 6.1.1.4'
  'Cu' 'Cu' 0.3201 1.2651
  'International Tables Vol C Tables 4.2.6.8 and 6.1.1.4'

_symmetry_cell_setting          Monoclinic
_symmetry_space_group_name_H-M  P2(1)/c

loop_
  _symmetry_equiv_pos_as_xyz
  'x, y, z'
  '-x, y+1/2, -z+1/2'
  '-x, -y, -z'
  'x, -y-1/2, z-1/2'

_cell_length_a                  10.202(2)
_cell_length_b                  9.535(2)
_cell_length_c                  11.980(3)
_cell_angle_alpha               90.00
_cell_angle_beta                107.648(3)
_cell_angle_gamma               90.00
_cell_volume                    1110.6(4)
_cell_formula_units_Z           2
_cell_measurement_temperature   200(2)
_cell_measurement_reflns_used   956
_cell_measurement_theta_min     2.99
_cell_measurement_theta_max     27.98

_exptl_crystal_description      block
_exptl_crystal_colour           colourless
_exptl_crystal_size_max        0.48
_exptl_crystal_size_mid        0.43
_exptl_crystal_size_min        0.17
_exptl_crystal_density_meas     ?
_exptl_crystal_density_diffrn  1.380
_exptl_crystal_density_method  'not measured'
_exptl_crystal_F_000           488
_exptl_absorpt_coefficient_mu   1.926
_exptl_absorpt_correction_type  multi-scan
_exptl_absorpt_correction_T_min 0.4590
_exptl_absorpt_correction_T_max 0.7293
_exptl_absorpt_process_details 'SADABS (Sheldrick, 2003)'
```

## \_exptl\_special\_details

```
;
Data collection is performed with four batch runs at
\ f = 0.00 \% (600 frames), at \ f = 90.00 \%
(600 frames), at \ f = 180 \% (600 frames) and
at \ f = 270 \% (600 frames).
Frame width = 0.30 \& in \w. Data is
merged, corrected for decay, and treated with
multi-scan absorption corrections.
;
```

```
_diffrn_ambient_temperature      200(2)
_diffrn_radiation_wavelength     0.71073
_diffrn_radiation_type           MoK\alpha
_diffrn_radiation_source         'fine-focus sealed tube'
_diffrn_radiation_monochromator   graphite
_diffrn_measurement_device_type  'Bruker AXS APEX diffractometer'
_diffrn_measurement_method       \w
_diffrn_detector_area_resol_mean  836.6
_diffrn_standards_number         0
_diffrn_standards_interval_count  0
_diffrn_standards_interval_time  0
_diffrn_standards_decay_%       1
_diffrn_reflns_number            14501
_diffrn_reflns_av_R_equivalents  0.0388
_diffrn_reflns_av_sigmaI/netI    0.0259
_diffrn_reflns_limit_h_min       -13
_diffrn_reflns_limit_h_max       13
_diffrn_reflns_limit_k_min       -12
_diffrn_reflns_limit_k_max       12
_diffrn_reflns_limit_l_min       -15
_diffrn_reflns_limit_l_max       15
_diffrn_reflns_theta_min         2.09
_diffrn_reflns_theta_max         28.32
_reflns_number_total             2757
_reflns_number_gt                2490
_reflns_threshold_expression     >2sigma(I)
```

```
_computing_data_collection       'SMART (Bruker, 2002)'
_computing_cell_refinement       'SAINT (Bruker, 2002)'
_computing_data_reduction        SAINT
_computing_structure_solution    'SHELXS-97 (Sheldrick, 1990)'
_computing_structure_refinement  'SHELXL-97 (Sheldrick, 1997)'
_computing_molecular_graphics    'SHELXTL (Sheldrick, 2001)'
_computing_publication_material 'SHELXTL (Sheldrick, 2001)'
```

## \_refine\_special\_details

```
;
Refinement of  $F^2$  against ALL reflections. The weighted R-factor wR and
goodness of fit S are based on  $F^2$ , conventional R-factors R are based
on F, with F set to zero for negative  $F^2$ . The threshold expression of
 $F^2 > 2\text{sigma}(F^2)$  is used only for calculating R-factors(gt) etc. and is
not relevant to the choice of reflections for refinement. R-factors based
on  $F^2$  are statistically about twice as large as those based on F, and R-
factors based on ALL data will be even larger.
;
```

```
_refine_ls_structure_factor_coef  Fsqd
_refine_ls_matrix_type            full
_refine_ls_weighting_scheme       calc
_refine_ls_weighting_details      'calc w=1/[\s^2^(Fo^2)+(0.0545P)^2+0.2574P] where P=(Fo^2+2Fc^2)/3'
_atom_sites_solution_primary      direct
_atom_sites_solution_secondary    difmap
_atom_sites_solution_hydrogens    geom
_refine_ls_hydrogen_treatment     constr
```

```
_refine_ls_extinction_method      none
_refine_ls_extinction_coef        ?
_refine_ls_number_reflns          2757
_refine_ls_number_parameters       123
_refine_ls_number_restraints       0
_refine_ls_R_factor_all            0.0337
_refine_ls_R_factor_gt             0.0302
_refine_ls_wR_factor_ref           0.0860
_refine_ls_wR_factor_gt            0.0830
_refine_ls_goodness_of_fit_ref     1.050
_refine_ls_restrained_S_all        1.050
_refine_ls_shift/su_max             0.001
_refine_ls_shift/su_mean            0.000
```

```
loop_
  _atom_site_label
  _atom_site_type_symbol
  _atom_site_fract_x
  _atom_site_fract_y
  _atom_site_fract_z
  _atom_site_U_iso_or_equiv
  _atom_site_adp_type
  _atom_site_occupancy
  _atom_site_symmetry_multiplicity
  _atom_site_calc_flag
  _atom_site_refinement_flags
  _atom_site_disorder_assembly
  _atom_site_disorder_group
Cu Cu 0.878593(19) 0.02862(2) 0.489253(17) 0.02631(10) Uani 1 1 d . . .
N1 N 1.04879(14) -0.18341(14) 0.41692(12) 0.0281(3) Uani 1 1 d . . .
N2 N 0.81903(14) -0.13073(15) 0.39402(12) 0.0279(3) Uani 1 1 d . . .
C1 C 1.13406(18) -0.28623(17) 0.37703(15) 0.0308(3) Uani 1 1 d . . .
C2 C 1.0365(2) -0.4091(2) 0.3328(2) 0.0482(5) Uani 1 1 d . . .
H2A H 1.0424 -0.4778 0.3961 0.058 Uiso 1 1 calc R . .
H2B H 1.0570 -0.4572 0.2668 0.058 Uiso 1 1 calc R . .
C3 C 0.8946(2) -0.3391(2) 0.29270(18) 0.0423(4) Uani 1 1 d . . .
H3A H 0.8692 -0.3119 0.2091 0.051 Uiso 1 1 calc R . .
H3B H 0.8227 -0.4018 0.3048 0.051 Uiso 1 1 calc R . .
C4 C 0.91513(17) -0.21028(16) 0.37199(13) 0.0269(3) Uani 1 1 d . . .
C5 C 1.1835(2) -0.2235(2) 0.28051(19) 0.0457(5) Uani 1 1 d . . .
H5A H 1.1045 -0.2071 0.2110 0.068 Uiso 1 1 calc R . .
H5B H 1.2475 -0.2886 0.2609 0.068 Uiso 1 1 calc R . .
H5C H 1.2303 -0.1344 0.3073 0.068 Uiso 1 1 calc R . .
C6 C 1.2593(2) -0.3285(2) 0.47933(18) 0.0480(5) Uani 1 1 d . . .
H6A H 1.2285 -0.3639 0.5440 0.072 Uiso 1 1 calc R . .
H6B H 1.3187 -0.2467 0.5058 0.072 Uiso 1 1 calc R . .
H6C H 1.3108 -0.4020 0.4536 0.072 Uiso 1 1 calc R . .
C8 C 0.66996(17) -0.16555(19) 0.35011(15) 0.0327(4) Uani 1 1 d . . .
C9 C 0.6147(2) -0.1722(3) 0.21601(18) 0.0524(5) Uani 1 1 d . . .
H9A H 0.6425 -0.0875 0.1826 0.079 Uiso 1 1 calc R . .
H9B H 0.5141 -0.1782 0.1917 0.079 Uiso 1 1 calc R . .
H9C H 0.6522 -0.2550 0.1881 0.079 Uiso 1 1 calc R . .
C10 C 0.6367(2) -0.3016(2) 0.4036(2) 0.0520(5) Uani 1 1 d . . .
H10A H 0.6809 -0.3003 0.4885 0.078 Uiso 1 1 calc R . .
H10B H 0.6710 -0.3817 0.3694 0.078 Uiso 1 1 calc R . .
H10C H 0.5369 -0.3100 0.3871 0.078 Uiso 1 1 calc R . .
C11 C 0.5954(2) -0.0459(3) 0.3897(3) 0.0574(7) Uani 1 1 d . . .
H11A H 0.6094 0.0413 0.3516 0.086 Uiso 1 1 calc R . .
H11B H 0.6320 -0.0352 0.4749 0.086 Uiso 1 1 calc R . .
H11C H 0.4969 -0.0669 0.3681 0.086 Uiso 1 1 calc R . .
```

```
loop_
  _atom_site_aniso_label
  _atom_site_aniso_U_11
  _atom_site_aniso_U_22
  _atom_site_aniso_U_33
  _atom_site_aniso_U_23
```

```
_atom_site_aniso_U_13
_atom_site_aniso_U_12
Cu 0.02519(14) 0.02513(14) 0.02687(14) -0.00677(7) 0.00527(9) 0.00078(7)
N1 0.0304(7) 0.0241(6) 0.0294(6) -0.0071(5) 0.0082(5) 0.0018(5)
N2 0.0264(7) 0.0277(7) 0.0276(6) -0.0061(5) 0.0053(5) -0.0025(5)
C1 0.0360(9) 0.0257(8) 0.0326(8) -0.0051(6) 0.0134(7) 0.0038(7)
C2 0.0538(12) 0.0340(10) 0.0609(13) -0.0182(9) 0.0235(10) -0.0027(9)
C3 0.0465(11) 0.0352(10) 0.0440(10) -0.0190(8) 0.0121(8) -0.0067(8)
C4 0.0336(8) 0.0238(7) 0.0232(7) -0.0034(6) 0.0084(6) -0.0019(6)
C5 0.0543(12) 0.0431(11) 0.0479(11) 0.0056(9) 0.0279(10) 0.0122(9)
C6 0.0551(12) 0.0448(11) 0.0407(10) -0.0011(9) 0.0096(9) 0.0197(10)
C8 0.0282(8) 0.0345(9) 0.0334(8) -0.0050(7) 0.0061(7) -0.0051(7)
C9 0.0459(11) 0.0659(15) 0.0361(10) -0.0001(10) -0.0017(9) -0.0072(11)
C10 0.0490(12) 0.0548(13) 0.0561(13) 0.0054(10) 0.0218(10) -0.0130(10)
C11 0.0294(10) 0.0552(14) 0.0851(19) -0.0265(12) 0.0135(11) -0.0021(9)
```

```
_geom_special_details
```

```
;
```

All esds (except the esd in the dihedral angle between two l.s. planes) are estimated using the full covariance matrix. The cell esds are taken into account individually in the estimation of esds in distances, angles and torsion angles; correlations between esds in cell parameters are only used when they are defined by crystal symmetry. An approximate (isotropic) treatment of cell esds is used for estimating esds involving l.s. planes.

```
;
```

```
loop_
```

```
_geom_bond_atom_site_label_1
_geom_bond_atom_site_label_2
_geom_bond_distance
_geom_bond_site_symmetry_2
_geom_bond_publ_flag
Cu N1 1.8671(14) 3_756 ?
Cu N2 1.8867(14) . ?
Cu Cu 2.4728(7) 3_756 ?
N1 C4 1.330(2) . ?
N1 C1 1.483(2) . ?
N1 Cu 1.8670(14) 3_756 ?
N2 C4 1.328(2) . ?
N2 C8 1.488(2) . ?
C1 C5 1.517(3) . ?
C1 C2 1.525(3) . ?
C1 C6 1.532(3) . ?
C2 C3 1.533(3) . ?
C3 C4 1.528(2) . ?
C8 C11 1.524(3) . ?
C8 C10 1.530(3) . ?
C8 C9 1.534(3) . ?
```

```
loop_
```

```
_geom_angle_atom_site_label_1
_geom_angle_atom_site_label_2
_geom_angle_atom_site_label_3
_geom_angle
_geom_angle_site_symmetry_1
_geom_angle_site_symmetry_3
_geom_angle_publ_flag
N1 Cu N2 175.59(6) 3_756 . ?
N1 Cu Cu 84.82(4) 3_756 3_756 ?
N2 Cu Cu 90.80(4) . 3_756 ?
C4 N1 C1 111.84(13) . . ?
C4 N1 Cu 124.53(11) . 3_756 ?
C1 N1 Cu 123.52(11) . 3_756 ?
C4 N2 C8 122.64(14) . . ?
C4 N2 Cu 117.28(11) . . ?
C8 N2 Cu 120.04(11) . . ?
N1 C1 C5 110.38(15) . . ?
```



N1 C1 C2 103.60(14) . . ?  
C5 C1 C2 111.74(17) . . ?  
N1 C1 C6 110.16(14) . . ?  
C5 C1 C6 108.91(17) . . ?  
C2 C1 C6 111.98(17) . . ?  
C1 C2 C3 103.28(15) . . ?  
C4 C3 C2 102.50(15) . . ?  
N2 C4 N1 122.53(14) . . ?  
N2 C4 C3 127.75(15) . . ?  
N1 C4 C3 109.70(14) . . ?  
N2 C8 C11 106.02(15) . . ?  
N2 C8 C10 111.95(16) . . ?  
C11 C8 C10 108.03(18) . . ?  
N2 C8 C9 113.01(15) . . ?  
C11 C8 C9 107.28(19) . . ?  
C10 C8 C9 110.24(17) . . ?

## loop\_

\_geom\_torsion\_atom\_site\_label\_1  
\_geom\_torsion\_atom\_site\_label\_2  
\_geom\_torsion\_atom\_site\_label\_3  
\_geom\_torsion\_atom\_site\_label\_4  
\_geom\_torsion  
\_geom\_torsion\_site\_symmetry\_1  
\_geom\_torsion\_site\_symmetry\_2  
\_geom\_torsion\_site\_symmetry\_3  
\_geom\_torsion\_site\_symmetry\_4  
\_geom\_torsion\_publ\_flag  
N1 Cu N2 C4 6.7(9) 3\_756 . . . ?  
Cu Cu N2 C4 -0.49(12) 3\_756 . . . ?  
N1 Cu N2 C8 -175.3(7) 3\_756 . . . ?  
Cu Cu N2 C8 177.51(12) 3\_756 . . . ?  
C4 N1 C1 C5 101.58(18) . . . ?  
Cu N1 C1 C5 -74.58(18) 3\_756 . . . ?  
C4 N1 C1 C2 -18.2(2) . . . ?  
Cu N1 C1 C2 165.66(13) 3\_756 . . . ?  
C4 N1 C1 C6 -138.11(17) . . . ?  
Cu N1 C1 C6 45.7(2) 3\_756 . . . ?  
N1 C1 C2 C3 28.5(2) . . . ?  
C5 C1 C2 C3 -90.35(19) . . . ?  
C6 C1 C2 C3 147.16(17) . . . ?  
C1 C2 C3 C4 -28.4(2) . . . ?  
C8 N2 C4 N1 -176.00(15) . . . ?  
Cu N2 C4 N1 1.9(2) . . . ?  
C8 N2 C4 C3 5.8(3) . . . ?  
Cu N2 C4 C3 -176.26(14) . . . ?  
C1 N1 C4 N2 -178.92(14) . . . ?  
Cu N1 C4 N2 -2.8(2) 3\_756 . . . ?  
C1 N1 C4 C3 -0.4(2) . . . ?  
Cu N1 C4 C3 175.70(12) 3\_756 . . . ?  
C2 C3 C4 N2 -162.95(18) . . . ?  
C2 C3 C4 N1 18.7(2) . . . ?  
C4 N2 C8 C11 -177.58(18) . . . ?  
Cu N2 C8 C11 4.5(2) . . . ?  
C4 N2 C8 C10 64.9(2) . . . ?  
Cu N2 C8 C10 -113.04(16) . . . ?  
C4 N2 C8 C9 -60.3(2) . . . ?  
Cu N2 C8 C9 121.77(16) . . . ?

\_diffn\_measured\_fraction\_theta\_max 0.997  
\_diffn\_refl\_theta\_full 25.00  
\_diffn\_measured\_fraction\_theta\_full 0.998  
\_refine\_diff\_density\_max 0.712  
\_refine\_diff\_density\_min -0.515  
\_refine\_diff\_density\_rms 0.079
